# Supplementary material
Source: PubMed Central journal article supplement (PMC7423704)
Supplement: NIHMS1573616-supplement-Supp_info.pdf [file NIHMS1573616-supplement-Supp_info.pdf]

SUPPLEMENTARY MATERIAL

# **Landscape of Combination Therapy Trials in Breast Cancer Brain Metastasis**

Jawad Fares, Deepak Kanojia, Aida Rashidi, Ilya Ulasov, and Maciej S. Lesniak

## **TABLE OF CONTENTS**

### **Supplementary Tables**

- Supplementary Table 1: Distribution of trials that use two classes of chemotherapeutic agents for breast cancer brain metastasis (n=37)
- Supplementary Table 2: Distribution of trials that use three classes of chemotherapeutic agents for breast cancer brain metastasis (n=7)

### **Supplementary Figures**

- Supplementary Figure 1: Selection of combination trials
- Supplementary Figure 2: Distribution of combination trials and patients across phases
- Supplementary Figure 3: Percent of combination trial publication

| <b>Supplementary Table 1: Distribution of trials that use two classes of chemotherapeutic agents for breast cancer brain metastasis (n=37)</b> |                            |                           |                      |                  |                |                  |                  |                |                          |
|------------------------------------------------------------------------------------------------------------------------------------------------|----------------------------|---------------------------|----------------------|------------------|----------------|------------------|------------------|----------------|--------------------------|
|                                                                                                                                                | HER-dimerization inhibitor | Tyrosine kinase inhibitor | PD-1/PD-L1 inhibitor | VEGF-A inhibitor | PARP inhibitor | Alpha interferon | Alkylating agent | PI3K inhibitor | DNA polymerase inhibitor |
| HER-dimerization inhibitor                                                                                                                     | 3                          | 3                         | 1                    | -                | -              | -                | -                | -              | -                        |
| CDK inhibitor                                                                                                                                  | 1                          | -                         | -                    | -                | -              | -                | -                | -              | -                        |
| PI3K inhibitor                                                                                                                                 | 2                          | -                         | -                    | -                | -              | -                | -                | -              | -                        |
| Thymidylate synthase inhibitor                                                                                                                 | 1                          | 6                         | -                    | 1                | -              | 1                | -                | 1              | -                        |
| Microtubule inhibitor                                                                                                                          | 1                          | 3                         | -                    | 1                | -              | -                | 1                | -              | -                        |
| Alkylating agent                                                                                                                               | -                          | 1                         | -                    | 1                | 1              | -                | -                | -              | -                        |
| Topoisomerase inhibitor                                                                                                                        | 1                          | 1                         | -                    | -                | 1              | -                | 1                | -              | -                        |
| mTOR inhibitor                                                                                                                                 | -                          | 1                         | -                    | -                | -              | -                | -                | -              | -                        |
| Aromatase inhibitor                                                                                                                            | -                          | 1                         | -                    | -                | -              | -                | -                | -              | -                        |
| WT1 peptide vaccine                                                                                                                            | -                          | -                         | 1                    | -                | -              | -                | -                | -              | -                        |
| Dihydrofolate reductase inhibitor                                                                                                              | -                          | -                         | -                    | -                | -              | -                | -                | -              | 1                        |

| <b>Supplementary Table 2: Distribution of trials that use three classes of chemotherapeutic agents for breast cancer brain metastasis (n=7)</b> |                                   |                                |                       |
|-------------------------------------------------------------------------------------------------------------------------------------------------|-----------------------------------|--------------------------------|-----------------------|
| <b>Trial Number</b>                                                                                                                             | <b>Combination of 3 Agents</b>    |                                |                       |
| NCT03199885                                                                                                                                     | HER-dimerization inhibitor        | PD-1/PD-L1 inhibitor           | Microtubule inhibitor |
| NCT02185352<br>NCT01281696                                                                                                                      | VEGF-A inhibitor                  | Topoisomerase inhibitor        | Alkylating agent      |
| NCT01783756                                                                                                                                     | Tyrosine kinase inhibitor         | Thymidylate synthase inhibitor | mTOR inhibitor        |
| NCT01305941                                                                                                                                     | mTOR inhibitor                    | HER-dimerization inhibitor     | Microtubule inhibitor |
| NCT01025349                                                                                                                                     | VEGF-A inhibitor                  | Microtubule inhibitor          | Alkylating agent      |
| NCT00397501                                                                                                                                     | Dihydrofolate reductase inhibitor | HER-dimerization inhibitor     | Alkylating agent      |

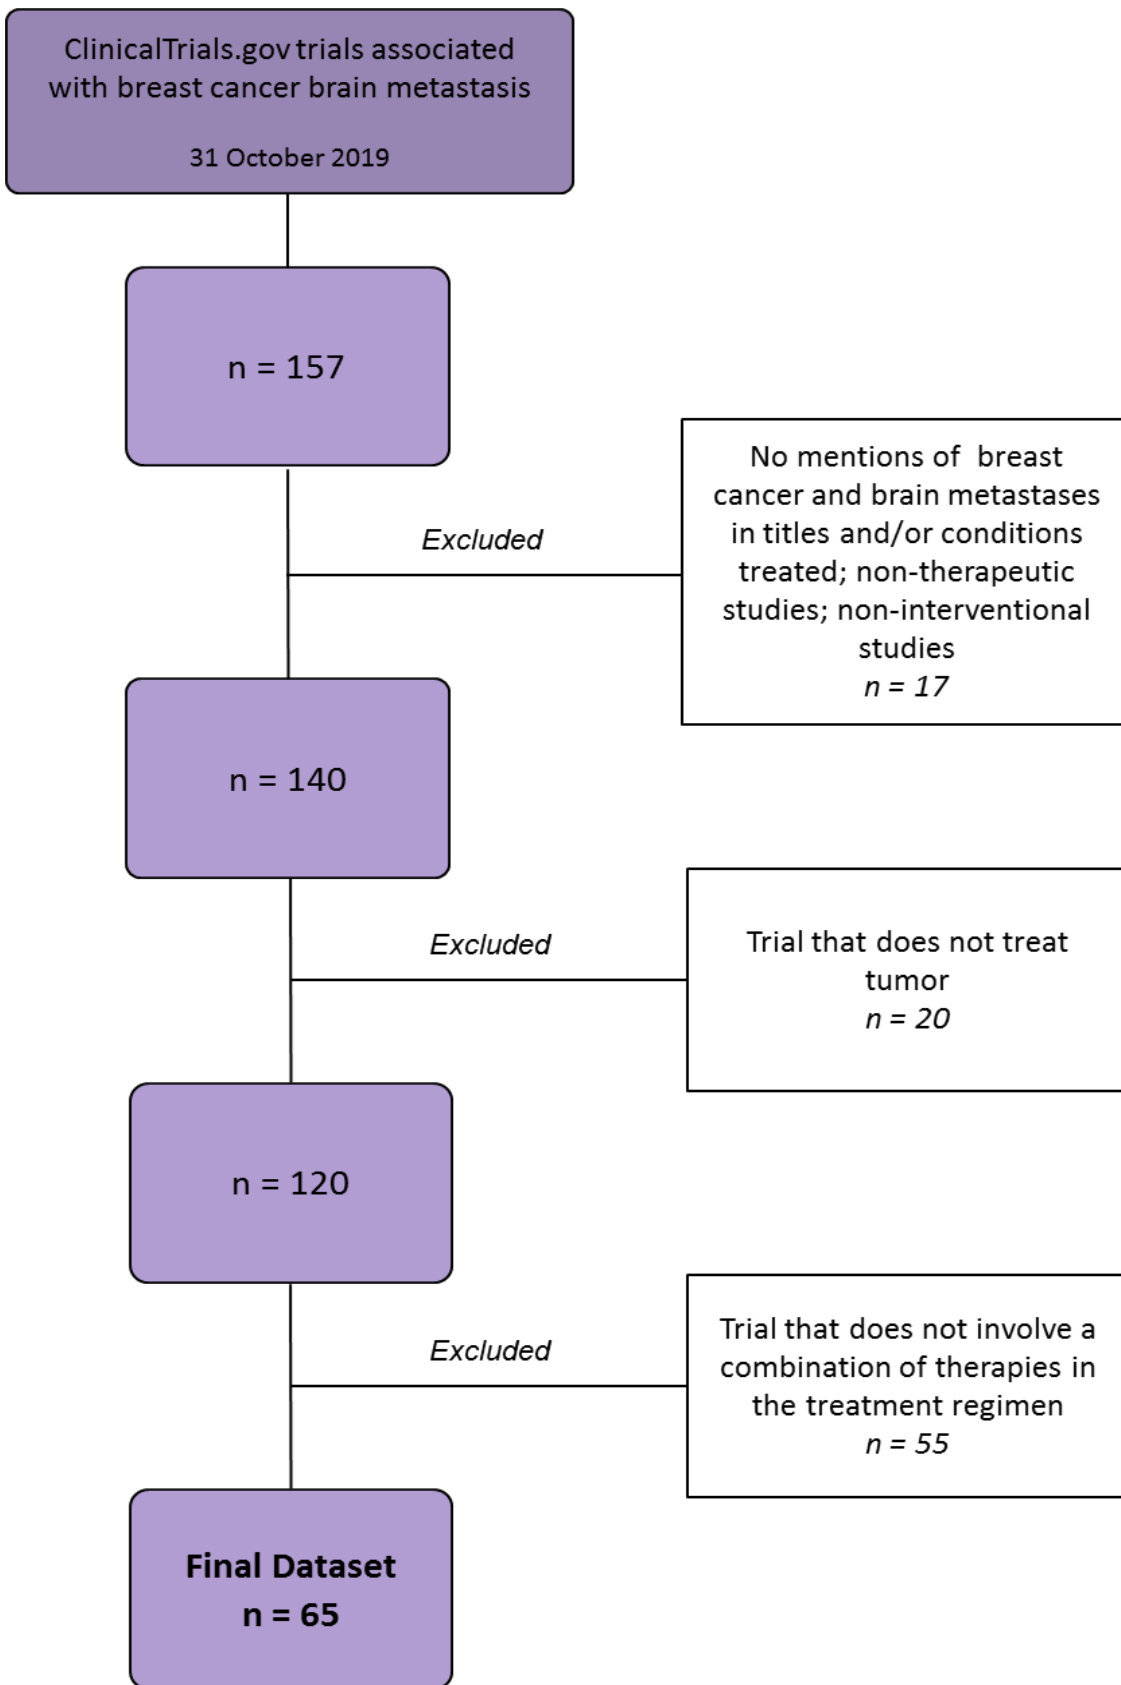

**Supplementary Figure 1:** Selection of combination trials

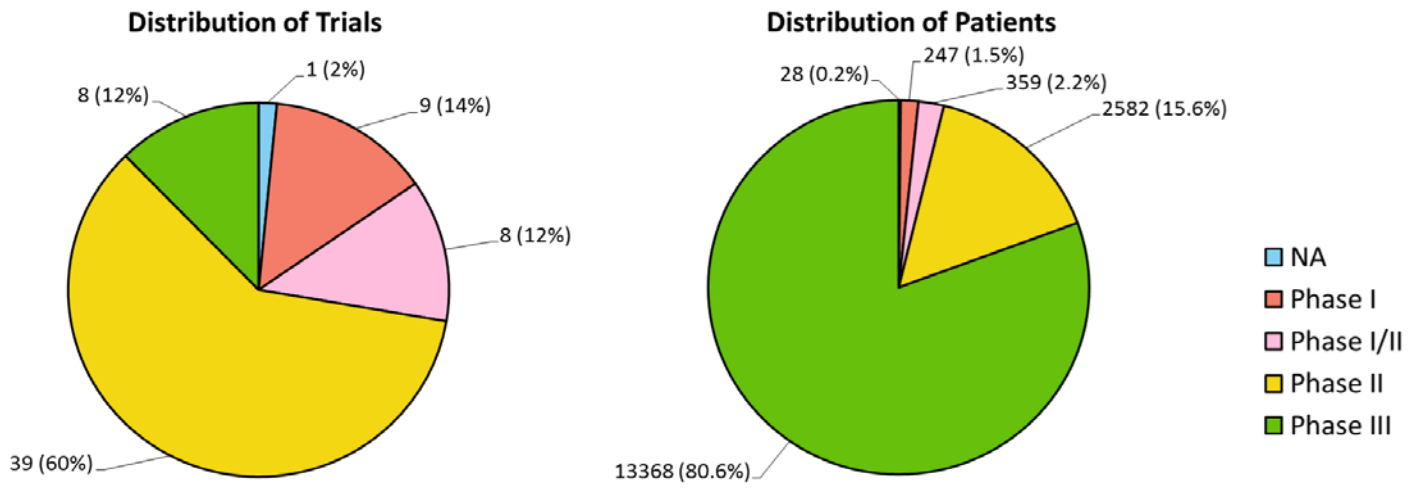

**Supplementary Figure 2:** Distribution of combination trials and patients across phases

### Cumulative Incidence of Trial Publication

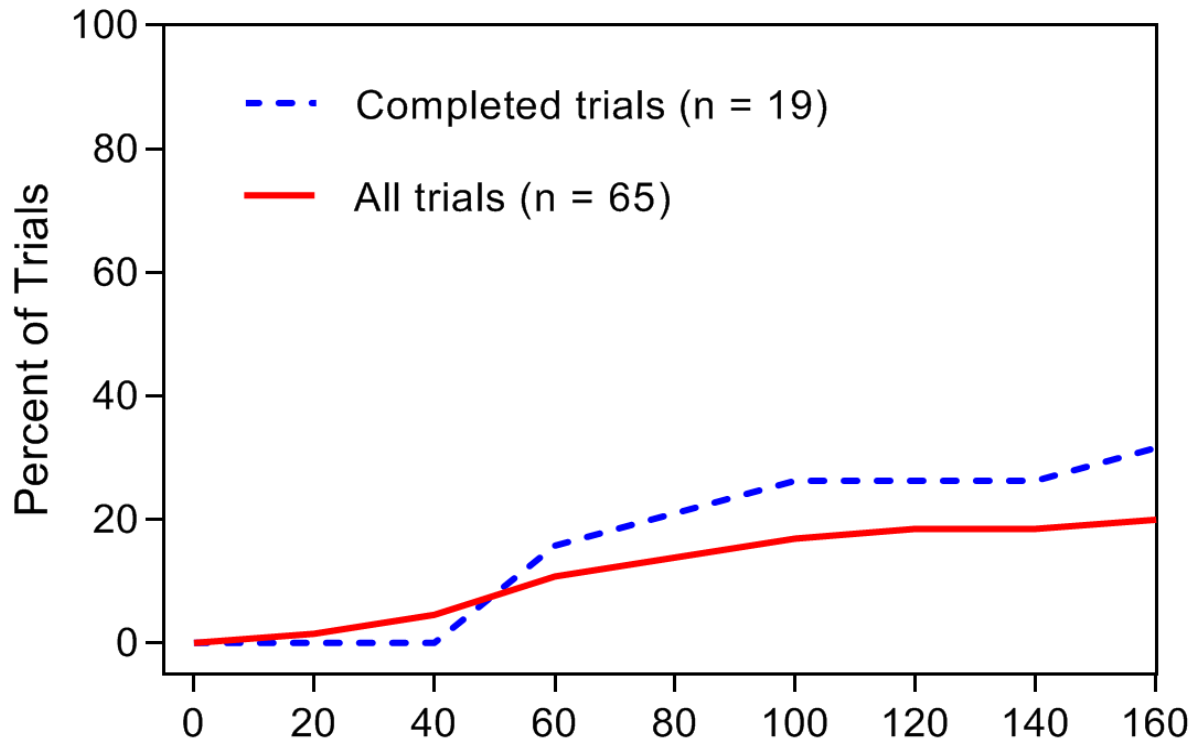

**Supplementary Figure 3:** Percent of combination trial publication
